# Supplementary material
Source: Springer Nature journal article supplement (https://www.springermedizin.de/resource/supplementary/12902_2014_252_MOESM3_ESM.pdf/9515878)

## SAFHS

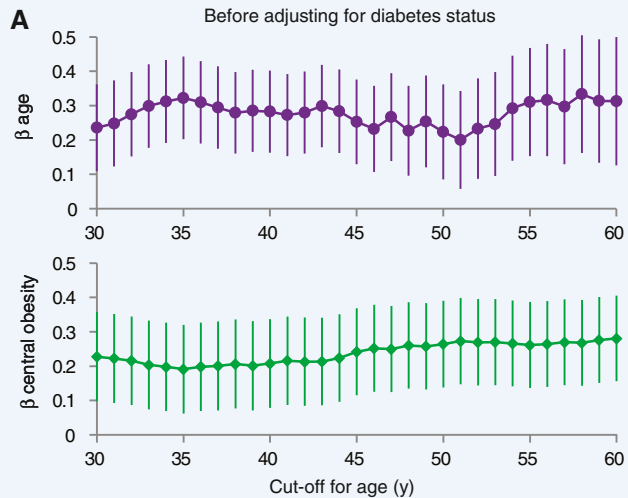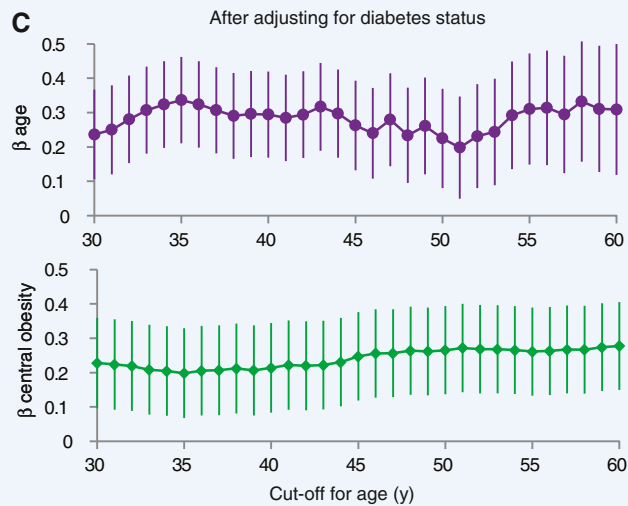

## NHANES 2007-10

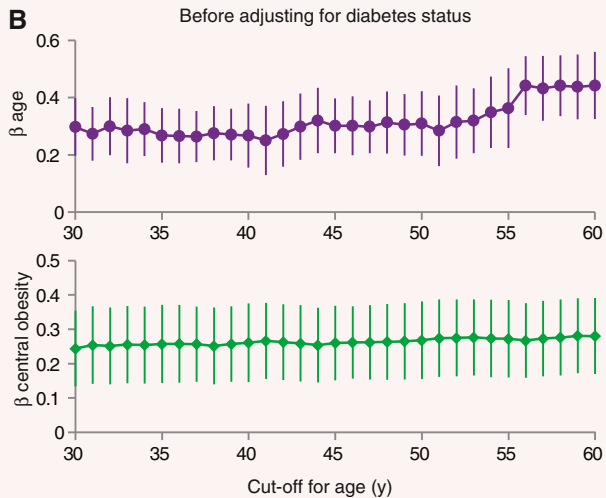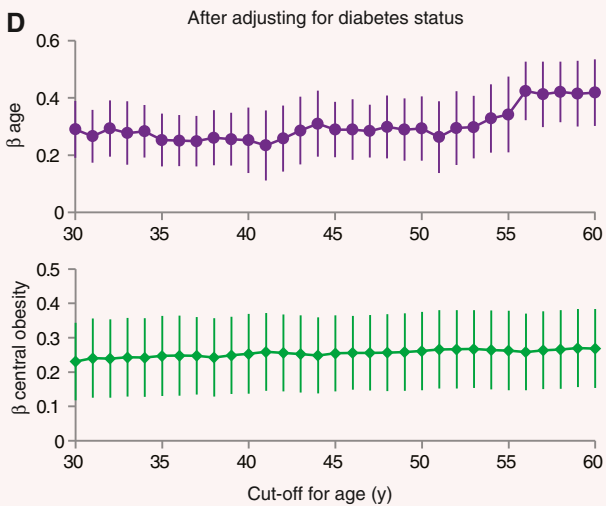

Supplement: MOESM3 [file 9515878]
